# Supplementary material for: Orbital reconstruction in nonpolar tetravalent transition-metal oxide layers
Source: Springer Nature journal article supplement (doi:10.1038/ncomms8306), 2015-06-24
Supplement: 41467_2015_BFncomms8306_MOESM1188_ESM.pdf [file 41467_2015_BFncomms8306_MOESM1188_ESM.pdf]

## SUPPLEMENTARY TABLES

Supplementary Table I. **Alternative matrix form of the effective spin Hamiltonian.** The “uncoupled” bond basis  $|\tilde{S}_i^z, \tilde{S}_j^z\rangle$  is here used.

| $\mathcal{H}_{\text{eff}}^{i,j}$     | $ \frac{1}{2}, \frac{1}{2}\rangle$                   | $ \frac{1}{2}, -\frac{1}{2}\rangle$                  | $ \frac{1}{2}, \frac{1}{2}\rangle$                   | $ \frac{1}{2}, -\frac{1}{2}\rangle$                 |
|--------------------------------------|------------------------------------------------------|------------------------------------------------------|------------------------------------------------------|-----------------------------------------------------|
| $\langle\frac{1}{2}, \frac{1}{2} $   | $\frac{J+\Gamma_{zz}}{4} + g_{zz}h_z$                | $\frac{h_x(g_{xx}+ig_{xy})-h_y(ig_{yy}+g_{xy})}{2}$  | $\frac{h_x(g_{xx}-ig_{xy})-h_y(ig_{yy}-g_{xy})}{2}$  | $-\frac{2\Gamma_{yy}+\Gamma_{zz}}{4}$               |
| $\langle\frac{1}{2}, -\frac{1}{2} $  | $\frac{h_x(g_{xx}-ig_{xy})-h_y(-ig_{yy}+g_{xy})}{2}$ | $-\frac{J+\Gamma_{zz}}{4}$                           | $\frac{2J+2iD-\Gamma_{zz}}{4}$                       | $\frac{h_x(g_{xx}-ig_{xy})-h_y(ig_{yy}-g_{xy})}{4}$ |
| $\langle-\frac{1}{2}, \frac{1}{2} $  | $\frac{h_x(g_{xx}+ig_{xy})-h_y(-ig_{yy}-g_{xy})}{2}$ | $\frac{2J-2iD-\Gamma_{zz}}{4}$                       | $-\frac{J+\Gamma_{zz}}{4}$                           | $\frac{h_x(g_{xx}+ig_{xy})-h_y(ig_{yy}+g_{xy})}{2}$ |
| $\langle-\frac{1}{2}, -\frac{1}{2} $ | $-\frac{2\Gamma_{yy}+\Gamma_{zz}}{4}$                | $\frac{h_x(g_{xx}+ig_{xy})-h_y(-ig_{yy}-g_{xy})}{2}$ | $\frac{h_x(g_{xx}-ig_{xy})-h_y(-ig_{yy}+g_{xy})}{2}$ | $\frac{J+\Gamma_{zz}}{4} - g_{zz}h_z$               |

Supplementary Table II. **Matrix elements of the effective spin Hamiltonian in the coupled basis.** The latter is described by the  $|\tilde{S}_{\text{tot}}, \tilde{S}_{\text{tot}}^z\rangle$  functions. The zero-field couplings are shown in bold.

| $\mathcal{H}_{\text{eff}}^{i,j}$ | $ 0, 0\rangle$                      | $ 1, -1\rangle$                                    | $ 1, 1\rangle$                                     | $ 1, 0\rangle$                          |
|----------------------------------|-------------------------------------|----------------------------------------------------|----------------------------------------------------|-----------------------------------------|
| $\langle 0, 0 $                  | $-\frac{3}{4}\mathbf{J}$            | $\frac{g_{xy}(h_y-ih_x)}{\sqrt{2}}$                | $\frac{g_{xy}(-ih_x-h_y)}{\sqrt{2}}$               | $\frac{i}{2}\mathbf{D}$                 |
| $\langle 1, -1 $                 | $\frac{g_{xy}(ih_x+h_y)}{\sqrt{2}}$ | $\frac{J}{4} + \frac{\Gamma_{zz}}{4} - 4g_{zz}h_z$ | $-\frac{\Gamma_{yy}}{2} - \frac{\Gamma_{zz}}{4}$   | $\frac{g_{xx}h_x+ig_{yy}h_y}{\sqrt{2}}$ |
| $\langle 1, 1 $                  | $\frac{g_{xy}(ih_x-h_y)}{\sqrt{2}}$ | $-\frac{\Gamma_{yy}}{2} - \frac{\Gamma_{zz}}{4}$   | $\frac{J}{4} + \frac{\Gamma_{zz}}{4} + 4g_{zz}h_z$ | $\frac{g_{xx}h_x-ig_{yy}h_y}{\sqrt{2}}$ |
| $\langle 1, 0 $                  | $-\frac{i}{2}\mathbf{D}$            | $\frac{g_{xx}h_x-ig_{yy}h_y}{\sqrt{2}}$            | $\frac{g_{xx}h_x+ig_{yy}h_y}{\sqrt{2}}$            | $\frac{J}{4} - \frac{\Gamma_{zz}}{4}$   |

Supplementary Table III. **Matrix form of the effective spin Hamiltonian with diagonal isotropic and symmetric anisotropic exchange.** The zero-field couplings are shown in bold.

| $\mathcal{H}_{\text{eff}}^{i,j}$ | $ s\rangle$              | $ t_x\rangle$                                                 | $ t_y\rangle$                         | $ t_z\rangle$                         |
|----------------------------------|--------------------------|---------------------------------------------------------------|---------------------------------------|---------------------------------------|
| $\langle s $                     | $-\frac{3}{4}\mathbf{J}$ | $-g_{xy}h_y$                                                  | $-g_{xy}h_x$                          | $\frac{i}{2}\mathbf{D}$               |
| $\langle t_x $                   | $-g_{xy}h_y$             | $\frac{J}{4} + \frac{\Gamma_{yy}}{2} + \frac{\Gamma_{zz}}{2}$ | $-ig_{zz}h_z$                         | $-ig_{yy}h_y$                         |
| $\langle t_y $                   | $g_{xy}h_x$              | $ig_{zz}h_z$                                                  | $\frac{J}{4} - \frac{\Gamma_{yy}}{2}$ | $ig_{xx}h_x$                          |
| $\langle t_z $                   | $-\frac{i}{2}\mathbf{D}$ | $ig_{yy}h_y$                                                  | $-ig_{xx}h_x$                         | $\frac{J}{4} - \frac{\Gamma_{zz}}{2}$ |

## SUPPLEMENTARY METHODS

To better illustrate the nature of the  $\{\tilde{s}, t_x, t_y, \tilde{t}_z\}$  states forming the basis of the effective Hamiltonian shown in Table V in the main text and the different steps followed to arrive to that particular matrix form, we also provide in this section ME's in (i) the “uncoupled”  $|\tilde{S}_i^z, \tilde{S}_j^z\rangle$  basis (see Supplementary Table I), (ii) the “coupled”  $|\tilde{S}_{\text{tot}}, \tilde{S}_{\text{tot}}^z\rangle$  basis in which the isotropic exchange is diagonal (Supplementary Table II) and (iii) the basis  $\{s, t_x, t_y, t_z\}$  that also diagonalizes the symmetric anisotropic exchange (Supplementary Table III). In the latter case,  $|s\rangle = |0, 0\rangle$  and  $|t_z\rangle = |1, 0\rangle$  while  $|t_x\rangle$  and  $|t_y\rangle$  are antisymmetric and symmetric combinations of  $|1, -1\rangle$  and  $|1, 1\rangle$ . The unitary matrix describing the transformation to the form given in Supplementary Table III reads

$$U_{\Gamma} = \begin{pmatrix} 1 & 0 & 0 & 0 \\ 0 & -\frac{1}{\sqrt{2}} & -\frac{i}{\sqrt{2}} & 0 \\ 0 & \frac{1}{\sqrt{2}} & -\frac{i}{\sqrt{2}} & 0 \\ 0 & 0 & 0 & 1 \end{pmatrix}. \quad (\text{S1})$$

Finally,  $|s\rangle$  and  $|t_z\rangle$  are to some degree admixed due to the antisymmetric exchange. The resulting states  $|\tilde{s}\rangle$  and  $|\tilde{t}_z\rangle$  imply a “rescaling” of the Zeeman couplings. The Hamiltonian thus takes the form shown in Table V in the main text. The corresponding transformation matrix reads

$$U_D = \begin{pmatrix} \frac{iD}{\sqrt{j(j/2-J_{x+y})}} & 0 & 0 & \frac{iD}{\sqrt{j(j/2+J_{x+y})}} \\ 0 & 1 & 0 & 0 \\ 0 & 0 & 1 & 0 \\ \sqrt{\frac{j/2-J_{x+y}}{j}} & 0 & 0 & \sqrt{\frac{j/2+J_{x+y}}{j}} \end{pmatrix}. \quad (\text{S2})$$
